# Supplementary material for: Improving performance of monolayer arsenene tunnel field-effect transistors by defects
Source: Royal Society of Chemistry journal article supplement (doi:10.1039/d2na00093h), 2022-01-01
Supplement: d2na00093h1.pdf [file d2na00093h1.pdf]

Supplementary Information for

## Improving performance of monolayer arsenene tunnel field-effect transistors by defects

Shun Song,<sup>a,b</sup> Jian Gong,<sup>\*a</sup> Hongyu Wen,<sup>b,c</sup> and Shenyuan Yang<sup>\*b,c</sup>

<sup>a</sup>School of Physics and Technology, Inner Mongolia University, Hohhot 010021, P. R. China

<sup>b</sup>State Key Laboratory of Superlattices and Microstructures, Institute of Semiconductors, Chinese Academy of Sciences, Beijing 100083, P. R. China

<sup>c</sup>Center of Materials Science and Optoelectronics Engineering, University of Chinese Academy of Sciences, Beijing 100049, P. R. China

### 1. DVs\_T defect in arsenene

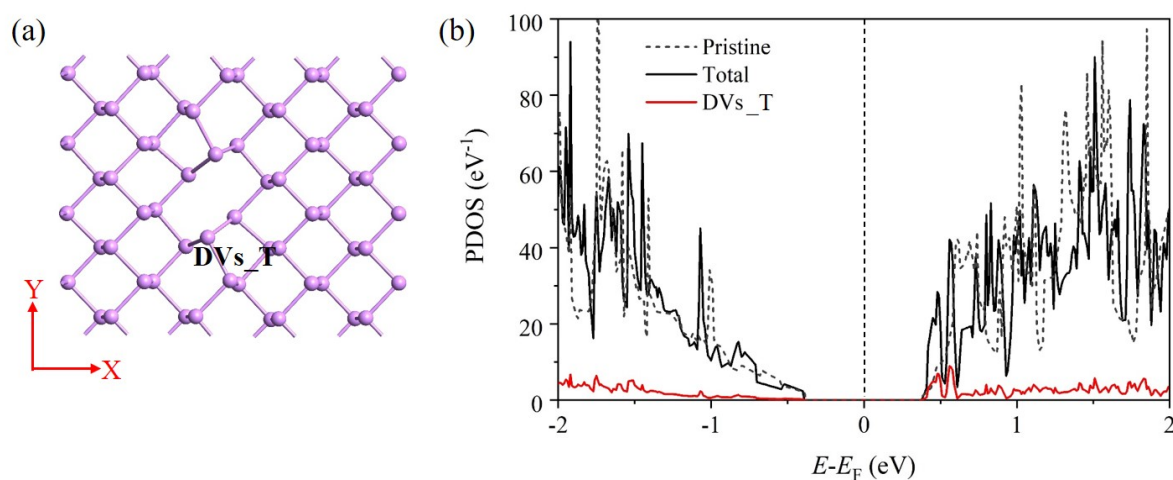

Fig. S1. (a) Double vacancies DVs\_T formed by two adjacent top-atoms in arsenene.

(b) PDOSs of arsenene monolayer with DVs\_T defect.

The DVs\_T defect with two adjacent vacancies in the top layer is shown in Fig. S1 (a). Similar to phosphorene [38, 39], the DVs\_T is more stable than DVs by 1.1 eV. However, DVs causes small structure distortion around the defect, while DVs\_T causes significant structure distortion around it. In arsenene, the adjacent bond length around DVs\_T is 2.47-2.63 Å, compared to 2.49-2.51 Å in pristine arsenene. Besides, PDOS

in Fig. S1 (b) shows that the DVs\_T defect does not introduce defect states in the band gap region. We speculate that this defect has little contribution to the improvement of the arsenene devices and would not introduce this defect to the arsenene TFET devices.

## 2. 2H defects in arsenene monolayer

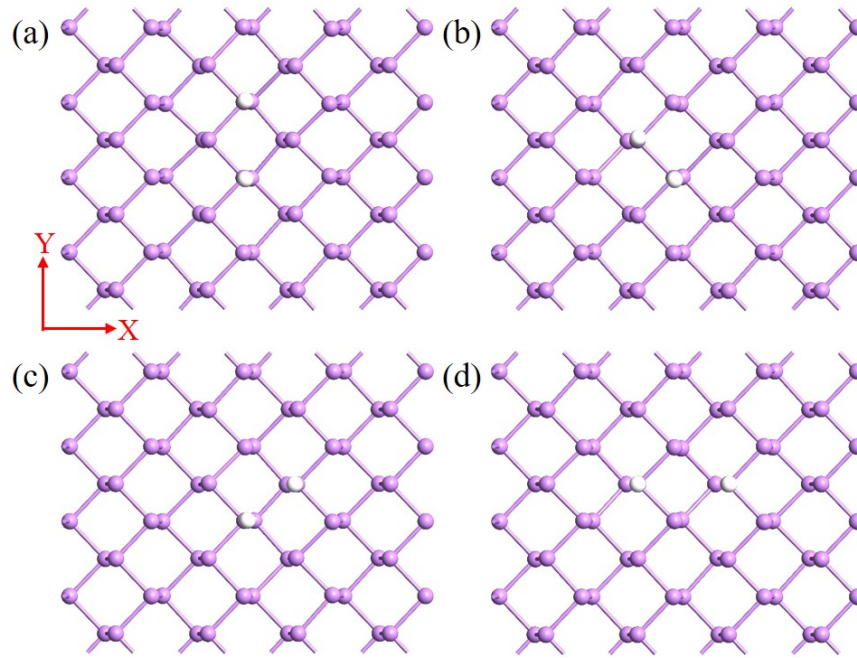

Fig. S2. Four different 2H defects in arsenene monolayer.

We obtain four stable configurations for two H adatoms as shown in Fig. S3 (a)-(d), denoted as 2H\_a, 2H\_b, 2H\_c, and 2H\_d. In 2H\_b structure, the two H atoms are adsorbed on two bonded As atoms. In 2H\_c structure, the two H atoms are adsorbed on two unbonded As atoms in the top layer. The adsorption energies of the four 2H defects are quite similar to each other (-3.25~-3.53 eV), indicating that they have similar stabilities. The PDOSs of the four 2H defects are shown in Fig. S3 (a)-(d). The PDOS of 2H\_a has been shown in Fig. 2 (d) in the original manuscript. Here we also show it in Fig. S3 (a) for better comparison. It can be seen that the four 2H defects have different electronic structures. Similar to the 2H\_a defect, both 2H\_b and 2H\_d defects introduce mid-gap states in the band gap region, while 2H\_c defect introduces a defect state just below the CBM. Therefore, 2H\_c defect may not be beneficial to the device transport performance.

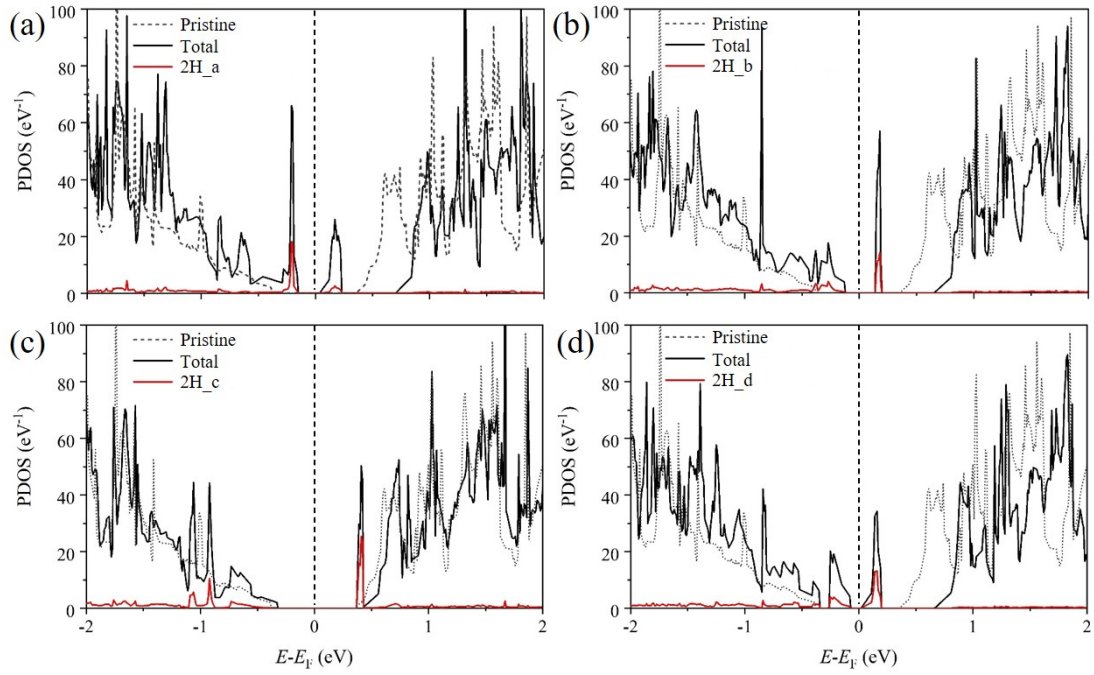

Fig. S3. PDOSs of four different 2H defects in arsenene monolayer.

### 3. Current-voltage characteristics of TFET devices with 2H defects

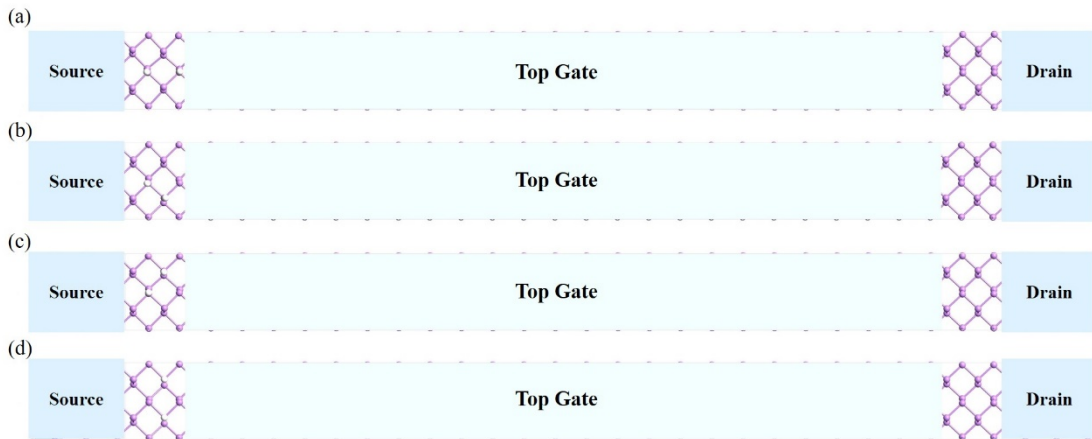

Fig. S4. Schematics of the double gate arsenene TFET devices along the zigzag directions with different 2H defects at the source-channel interface.

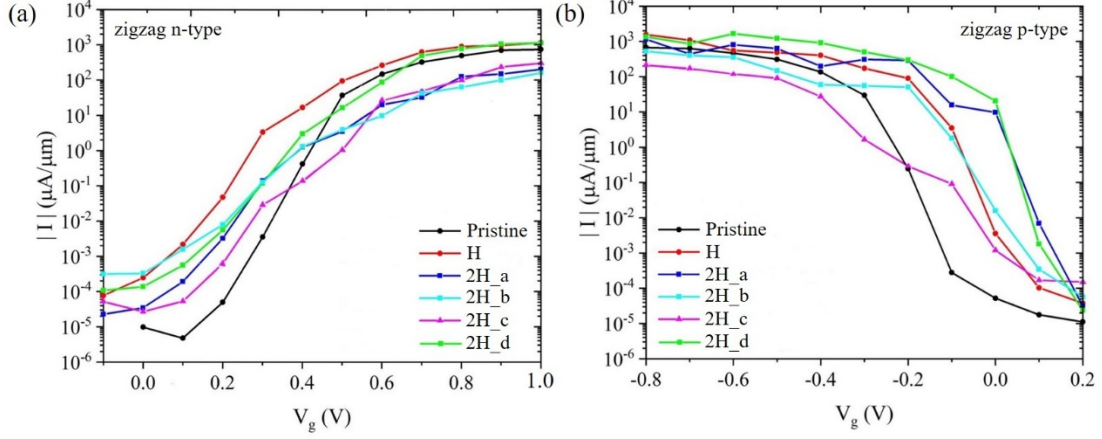

Fig. S5. Current-voltage characteristics of the arsenene TFET devices along the zigzag direction with different 2H defects.

We then simulate the performance of the TFET devices along zigzag transport direction with different 2H defects at the source-channel interface, as shown in Fig. S4. Their current-voltage characteristics are plotted in Fig. S5 and compared to the pristine devices and the devices with one H adatom. As summarized in Table S1, 2H defects could partially improve the performance of the devices. For example, the n-type and p-type devices with 2H\_a defect, and the p-type devices with 2H\_b and 2H\_c defect all have SS values below 60 mV/decade. The SS value of the p-type devices with 2H\_d defect can even reach 25 mV/decade. However, the ON-state currents of all the devices are smaller than those with one H defect. The ON-state currents of both n-type and p-type devices with 2H\_d defect are the largest due to the defect states near the Fermi level. But the ON-state currents are still below the ITRS 2022 requirement of 1330  $\mu\text{A}/\mu\text{m}$  for HP devices. We can conclude that the 2H defects cannot further improve the device performance.

**Table S1 Summary of the performance of arsenene TFET devices along zigzag direction with single H defect and different 2H defects. The ITRS 2022 targets for HP and LP devices at the 8.8 nm technology node are presented for comparison.**

| defects      | devices | SS (mV/decade) | $I_{\text{OFF}}$ ( $\mu\text{A}/\mu\text{m}$ ) | $I_{\text{ON}}$ ( $\mu\text{A}/\mu\text{m}$ ) | $I_{\text{ON}}/I_{\text{OFF}}$ |
|--------------|---------|----------------|------------------------------------------------|-----------------------------------------------|--------------------------------|
| pristine     | n-type  | 49             | $2 \times 10^{-5}$                             | 707                                           | $3.54 \times 10^7$             |
|              | p-type  | 34             | $2 \times 10^{-5}$                             | 500                                           | $2.50 \times 10^7$             |
| H            | n-type  | 56             | 0.1                                            | 1160                                          | $1.16 \times 10^4$             |
|              | p-type  | 34             | 0.1                                            | 1563                                          | $1.56 \times 10^4$             |
| 2H_a         | n-type  | 57             | 0.1                                            | 201                                           | $2.01 \times 10^3$             |
|              | p-type  | 31             | 0.1                                            | 942                                           | $9.42 \times 10^3$             |
| 2H_b         | n-type  | 80             | 0.1                                            | 521                                           | $5.21 \times 10^3$             |
|              | p-type  | 50             | 0.1                                            | 160                                           | $1.60 \times 10^3$             |
| 2H_c         | n-type  | 63             | 0.1                                            | 411                                           | $4.11 \times 10^3$             |
|              | p-type  | 56             | 0.1                                            | 212                                           | $2.12 \times 10^3$             |
| 2H_d         | n-type  | 69             | 0.1                                            | 1120                                          | $1.12 \times 10^4$             |
|              | p-type  | 25             | 0.1                                            | 864                                           | $8.64 \times 10^3$             |
| ITRS 2022 HP |         |                | 0.1                                            | 1330                                          | $1.33 \times 10^4$             |
| ITRS 2022 LP |         |                | $2 \times 10^{-5}$                             | 461                                           | $2.31 \times 10^7$             |
